# Supplementary material
Source: PubMed Central journal article supplement (PMC2654781)
Supplement: NIHMS90184-supplement-S1_figure.pdf [file NIHMS90184-supplement-S1_figure.pdf]

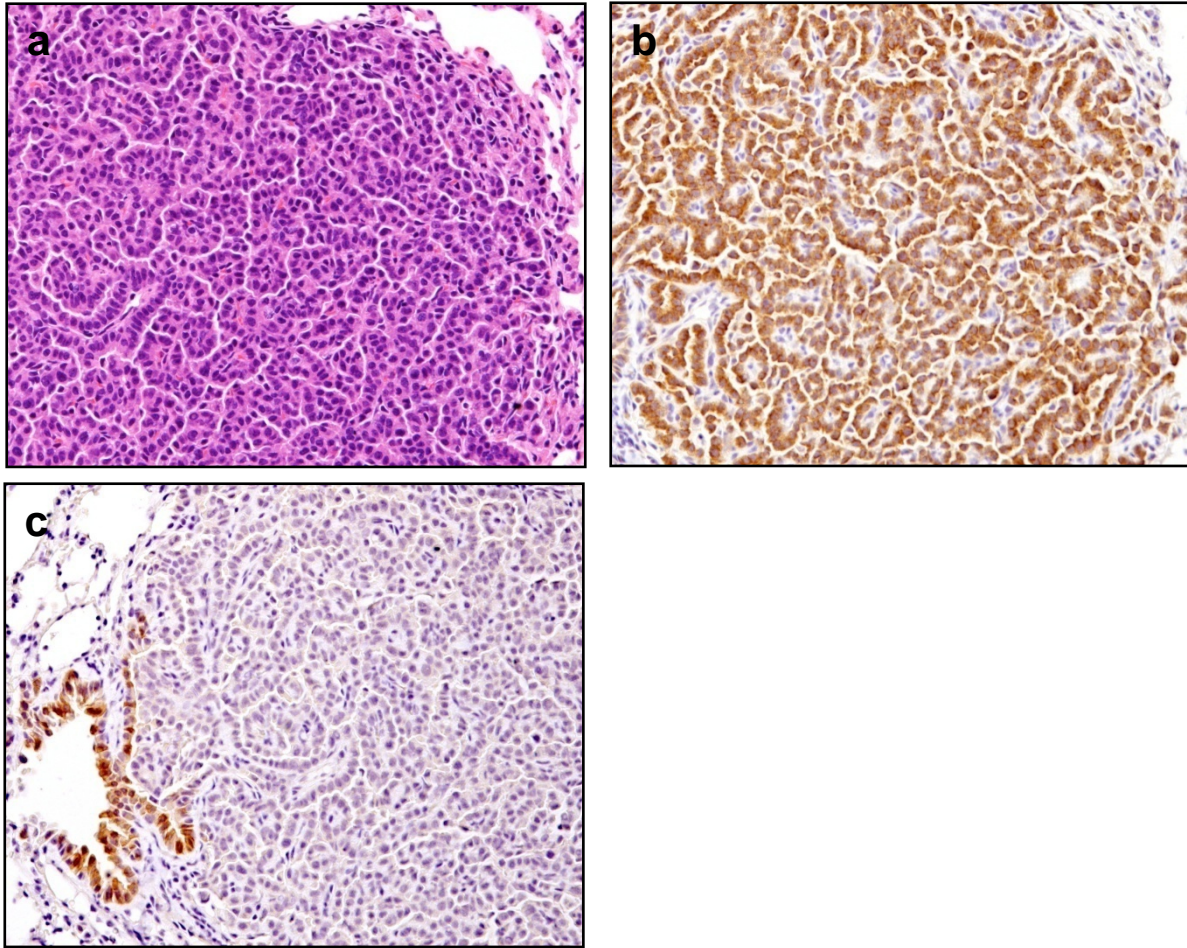

**Supplemental Figure 1:** Pathology and immunohistochemistry of lung tumors in *Kras<sup>G1</sup>* heterozygous mice. Almost all tumors were (a) papillary adenomas, which stained positively for (b) SP-C and negatively for (c) CCA/CC10.
