# Supplementary material
Source: PubMed Central journal article supplement (PMC2654781)
Supplement: NIHMS90184-supplement-S1_table.pdf [file NIHMS90184-supplement-S1_table.pdf]

---

**Supplementary Table 1: *ras* mutations in urethane induced lung tumors**

---

| <b>Mouse Genotype</b>             | <b><i>Kras</i> Mutation</b> | <b><i>HrasKI</i> Mutation</b> | <b><i>KrasKI</i> Mutation</b> | <b><i>Hras</i> Mutation</b> |
|-----------------------------------|-----------------------------|-------------------------------|-------------------------------|-----------------------------|
| <i>WT</i><br>( <i>Kras/Kras</i> ) | 21/27                       | -                             | -                             | 0/27                        |
| <i>HrasKI/HrasKI</i>              | -                           | 32/35                         | -                             | 0/35                        |
| <i>HrasKI/Kras</i> *              | 6/63                        | 58/63                         | -                             | 0/63                        |
| <i>KrasKI/Kras</i>                | 24/33                       | -                             | 0/33                          | 0/33                        |

---

\* two tumors have mutation in both *HrasKI* and *Kras* alleles

---

To et al.
