# Supplementary material
Source: PubMed Central journal article supplement (PMC2654781)
Supplement: NIHMS90184-supplement-S2_table.pdf [file NIHMS90184-supplement-S2_table.pdf]

---

**Supplementary Table 2: Primer sequences**

---

| <b>Primer</b> | <b>Sequence</b>                 | <b>Use</b>                                  |
|---------------|---------------------------------|---------------------------------------------|
| K_Common      | 5'-CCAACAGATATGGTGA CT CATGC-3' | Genotyping of HrasKI and KrasKI alleles.    |
| K_WT          | 5'-GCACCTGAATTCACATGCAT-3'      |                                             |
| K_KI          | 5'-TCGTGCTTTACGGTATCGCC-3'      |                                             |
| Kras_61F      | 5'-CCAGACTGTGTTTCTCCCTTC-3'     | Mutation detection at Kras codon 61.        |
| Kras_61R      | 5'-GGTCATTGGAGTAACACCATCTC-3'   |                                             |
| Kras_12F      | 5'-GAAGATGAAAGTACTGGTTTCCA-3'   | Mutation detection at Kras codons 12 and 13 |
| Kras_12R      | 5'-CCTATGGTTCCCTAACACCC-3'      |                                             |
| Hras_F        | 5'-AAGCCTGTTGTTTTGCAGGA-3'      | Mutation detection at Hras codon 61.        |
| Hras_R        | 5'-GGTGGCTCACCTG TACTGATG-3'    |                                             |
| KI_F          | 5'-CCAGACTGTGTTTCTCCCTTC-3'     | Mutation detection in HrasKI allele.        |
| KI-R          | 5'-TGTAGGGGATGCCATAGCTG-3'      |                                             |

---
